# Supplementary material for: Real-time path planning for autonomous vehicle off-road driving
Source: PeerJ Comput Sci. 2024 Jul 24;10:e2209. doi: 10.7717/peerj-cs.2209 (PMC11323055; doi:10.7717/peerj-cs.2209)
Supplement: Supplemental Information 2 [file peerj-cs-10-2209-s002.xlsx]

## Sheet: Graphs Time
RRT	A*	RRT	A*	RRT	A*	RRT	A*	RRT	A*	RRT	A*	RRT	A*	RRT	A*	RRT	A*	RRT	A*
0.628958	1.74185	0.0513716	0.756021	0.161476	0.708138	0.0876286	0.937101	0.0678017	0.661739	0.296238	1.66448	0.145285	1.30791	0.101416	1.18814	0.0710086	1.17129	1.13931	0.76873
0.272377	1.72332	0.0548696	0.740128	0.0488728	0.707433	0.0644034	0.953821	0.125543	0.716669	0.252393	1.62174	0.142513	1.32297	0.0715278	1.22831	0.0664949	1.17705	0.0341048	0.798987
0.328964	1.72498	0.0647966	0.742195	0.0441631	0.708492	0.0578406	0.957289	0.0598017	0.670789	0.239369	1.6045	0.217143	1.32226	0.079991	1.20133	0.0683577	1.17298	6.93689	0.772831
0.317759	1.7321	0.0259386	0.815079	0.0559822	0.716676	0.0557093	0.964541	0.0813858	0.663127	0.448836	1.68983	0.192791	1.32063	0.101705	1.20712	0.072585	1.17151	4.46855	0.77405
0.331954	1.70374	0.0505123	0.785001	0.0315056	0.714091	0.0655953	0.952214	0.0555495	0.673888	0.190287	1.67679	0.290436	1.32359	0.077904	1.19501	0.101483	1.20259	0.1096	0.772988
0.208242	1.69275	0.0595567	0.764669	0.0385816	0.711759	0.0749754	0.951139	0.0643376	0.680533	0.185856	1.607	0.15524	1.33127	0.0626993	1.20324	0.0713048	1.18159	0.0288983	0.803849
0.216246	1.71735	0.0254874	0.740842	0.0362447	0.70245	0.209249	0.951737	0.0915333	0.661432	0.202661	1.62799	0.118367	1.33583	0.0626276	1.19666	0.0593398	1.18571	0.0322604	0.794008
0.291431	1.71441	0.0437725	0.734757	0.0423806	0.73104	0.0650773	0.954148	0.0841657	0.669944	0.18943	1.62153	0.119628	1.37712	0.081492	1.20857	0.0717077	1.17347	0.454023	0.778076
0.168746	1.70565	0.0255114	0.737966	0.0326462	0.761203	0.0487458	0.945843	0.101103	0.687443	0.220969	1.61787	0.818047	1.32005	0.0581987	1.20612	0.0637068	1.18508	0.0455167	0.7708
0.181939	1.70908	0.0401434	0.738898	0.0415907	0.716559	0.0870062	0.94814	0.0635503	0.65698	0.217141	1.63479	0.117801	1.31546	0.0752041	1.20578	0.0523712	1.17236	0.085976	0.774859
0.179884	1.7354	0.0384471	0.734057	0.0375204	0.680495	0.0699174	0.949726	0.0778436	0.67458	0.213115	1.61875	0.110261	1.34719	0.128199	1.24461	0.0513474	1.18862	0.0470438	0.781353
0.137057	1.7177	0.027387	0.733861	0.0466865	0.680796	0.0680736	0.960529	0.0679266	0.675215	0.269673	1.63254	0.116386	1.31881	0.0702336	1.24747	0.0499641	1.18538	0.0678293	0.777116
0.152232	1.70348	0.0296526	0.758528	0.0414924	0.673343	0.0485046	0.94294	0.0601985	0.662392	0.217882	1.61197	0.134406	1.31798	0.0651211	1.2092	0.0589487	1.19606	0.569922	0.774818
0.268067	1.72024	0.0427691	0.802819	0.0422202	0.671321	0.0679838	0.949908	0.0541802	0.666707	0.633035	1.64635	0.259377	1.32711	0.0732152	1.20532	0.0675413	1.17103	0.0523935	0.770069
0.194152	1.72371	0.0614948	0.868865	0.0449008	0.68126	0.0553776	0.947314	0.0674379	0.670033	0.192864	1.66633	0.132863	1.33404	0.0781213	1.20862	0.0922446	1.17012	0.0416211	0.801514
0.231176	1.71618	0.0235597	0.734603	0.0377748	0.687079	0.0801464	0.948178	0.0532465	0.664381	0.178794	1.61666	0.137185	1.32594	0.0605524	1.20811	0.0702276	1.20512	15.3346	0.847256
0.171746	1.69899	0.0340074	0.73601	0.0620851	0.712229	0.0349178	0.941548	0.0508954	0.668039	1.64677	1.59423	0.174185	1.34118	0.145041	1.25939	0.0888512	1.18532	1.49153	0.802571
0.192542	1.71534	0.048867	0.769117	0.0364326	0.676887	0.0532908	0.947425	0.0770698	0.668756	0.205848	1.60501	0.131101	1.37141	0.611237	1.20956	0.0836484	1.16675	0.0382131	0.799934
0.417388	1.7206	0.064128	0.74021	0.0399495	0.665999	0.0416934	0.957931	0.0672993	0.660278	0.260934	1.59413	0.217087	1.31173	0.0797387	1.20751	0.0598801	1.16992	2.12562	0.790096
0.146472	1.69696	0.0330017	0.733787	0.0756357	0.663651	0.0682501	0.991465	0.0789194	0.677559	0.180338	1.60113	0.125171	1.31954	0.0559063	1.21781	0.051195	1.18081	0.13286	0.78059
0.160066	1.70465	0.0529031	0.737101	0.0378666	0.679866	0.0540092	0.952594	0.0787727	0.682866	0.200323	1.60118	0.148608	1.32504	0.0568243	1.25871	0.0618136	1.16034	0.0291732	0.837181
0.173975	1.71955	0.0320363	0.75261	0.0524177	0.668419	0.0415824	0.949899	0.0568411	0.683854	0.209244	1.59956	0.121682	1.32372	0.0999208	1.19623	0.0757332	1.16802	0.045993	0.783271
0.171369	1.70118	0.0256508	0.732793	0.0441524	0.663657	0.0453762	0.943431	0.0575327	0.736808	0.164942	1.61259	0.123357	1.32291	0.0578962	1.21252	0.0680894	1.19378	0.0398788	0.778192
0.164663	1.6963	0.0465983	0.732852	0.0660446	0.674288	0.0333258	0.963098	0.0660053	0.689594	0.217921	1.59553	0.125074	1.32238	0.110573	1.20127	0.0594163	1.23456	0.0273197	0.775661
0.243735	1.74744	0.0518654	0.743863	0.0353473	0.66678	0.0486657	0.953636	0.0563558	0.663833	0.189616	1.62231	0.115396	1.32049	0.0648674	1.19963	0.0946968	1.18437	0.0322764	0.793968
0.246029	1.72116	0.0625791	0.7443	0.0396033	0.670783	0.0382223	0.955055	0.0704094	0.654717	0.359811	1.58892	0.136577	1.33222	0.0833764	1.2004	0.0639858	1.17776	0.0419956	0.807303
0.27409	1.71374	0.0771534	0.742619	0.0543906	0.718882	0.0957059	0.979422	0.0637915	0.718386	0.228702	1.58784	0.12393	1.31823	0.22089	1.19473	0.334056	1.17502	1.33376	0.817497
0.160938	1.71697	0.0547856	0.737134	0.0581567	0.68415	0.0418705	0.966754	0.070595	0.661981	1.36128	1.61877	0.119503	1.31698	0.0591857	1.21047	0.0579153	1.18674	2.19098	0.777809
0.165074	1.72518	0.09589	0.747462	0.0335393	0.667884	0.0438662	0.966297	0.0501374	0.654574	0.186631	1.60938	0.119865	1.31095	0.0647568	1.19686	0.0527154	1.17742	0.0337221	0.778534
0.284038	1.71918	0.0303094	0.74765	0.0422146	0.680203	0.0488076	0.99411	0.059848	0.673652	0.190973	1.62537	0.131081	1.3287	0.0756345	1.20028	0.0564235	1.17764	16.3566	0.787841
0.337842	1.71389	0.0380622	0.737321	0.0441261	0.67534	0.0473823	0.951937	0.0494539	0.666756	0.231914	1.61613	0.126861	1.32568	0.0599814	1.19847	0.0567444	1.17335	0.0344919	0.825677
0.14063	1.72283	0.0359802	0.735596	0.0454963	0.669986	0.0598177	0.958848	0.0675682	0.672287	0.325524	1.59912	0.152735	1.31894	0.0513709	1.19813	0.0502152	1.16211	0.0410677	0.781471
0.182496	1.72928	0.0452833	0.738063	0.032044	0.663836	0.0466916	0.952466	0.0597924	0.707941	0.199893	1.62025	0.174441	1.33751	0.0618945	1.20543	0.0522377	1.19824	0.157412	0.78464
0.164393	1.71074	0.0264703	0.752872	0.0321261	0.683409	0.0533643	0.961517	0.0526266	0.660073	0.21871	1.61477	0.123095	1.32662	0.0707052	1.19979	0.107017	1.23743	1.83315	0.773242
0.170692	1.69719	0.0581507	0.730578	0.0560746	0.668898	0.0520133	0.950747	0.0554271	0.655961	0.204315	1.63398	0.116848	1.30825	0.065125	1.20456	0.0566591	1.18123	2.83767	0.78706
0.143369	1.72408	0.0440577	0.737087	0.0437661	0.670216	0.0522879	0.964039	0.0889551	0.670323	0.172962	1.67197	0.105064	1.33495	0.0858135	1.20834	0.0537744	1.17673	2.03454	0.794829
0.224397	1.70888	0.0478522	0.744532	0.0579752	0.669789	0.0752084	0.948267	0.0774478	0.656646	0.205709	1.61021	0.140687	1.33535	0.0667907	1.19618	0.0584071	1.16285	1.79293	0.821986
0.184222	1.70329	0.0467072	0.742041	0.0363905	0.661956	0.0630837	0.947148	0.066325	0.658607	0.260283	1.60779	0.110366	1.35515	0.0571068	1.19996	0.0560338	1.2072	0.0349973	0.770785
0.242464	1.71393	0.0474512	0.729011	0.0339385	0.668006	0.0719885	0.965737	0.0461894	0.668187	0.243927	1.59483	0.110746	1.36439	0.0767757	1.22089	0.0503818	1.18994	0.0367359	0.773102
0.226075	1.71935	0.0651999	0.735768	0.0445985	0.670535	0.0598938	0.973621	0.0840095	0.659188	0.18916	1.5837	0.107885	1.32865	0.0722024	1.2323	0.0841662	1.17397	3.14188	0.787287
0.208819	1.70247	0.0371212	0.747924	0.0436934	0.675028	0.03594	0.946743	0.0665234	0.653331	0.219838	1.62969	0.113985	1.31387	0.0935226	1.21566	0.0437495	1.17772	0.0275932	0.810365
0.191846	1.72164	0.03143	0.7473	0.0383528	0.675689	0.0532185	0.942434	0.0644596	0.674178	0.211076	1.74337	0.145824	1.31885	0.0635416	1.2387	0.0707029	1.17625	0.0348329	0.802223
0.173583	1.71879	0.0289554	0.736505	0.0345158	0.676175	0.0501896	0.946918	0.0606367	0.657449	0.177194	1.68963	0.136087	1.32379	0.0614001	1.23336	0.05739	1.20285	0.0421088	0.778922
0.231225	1.69364	0.0609508	0.749547	0.0448912	0.667087	0.0576535	0.944789	0.0665959	0.656741	0.19271	1.6855	0.114126	1.31891	0.0750581	1.25683	0.0873192	1.21489	0.0375864	0.780861
0.226099	1.70775	0.0501042	0.790308	0.0567783	0.665087	0.0646264	0.945169	0.055106	0.670923	0.193551	1.69794	0.128486	1.33091	0.0560837	1.20493	0.0452893	1.18473	0.0599992	0.790907
0.216209	1.70962	0.0391929	0.738085	0.0349832	0.675875	0.0441905	0.952597	0.0840071	0.664208	0.220659	1.70261	0.117832	1.3335	0.0616989	1.21416	0.0491069	1.17917	0.0307896	0.785948
0.184638	1.70235	0.0290283	0.728103	0.038892	0.68315	0.0414747	0.947825	0.0934728	0.652815	0.236059	1.66676	0.156094	1.32316	0.0638019	1.20926	0.0767212	1.17888	0.0325469	0.78576
0.230396	1.70358	0.026392	0.729982	0.0316436	0.708919	0.0812134	0.943627	0.078472	0.668654	0.182699	1.59765	0.132065	1.35349	0.0667925	1.20733	0.0592092	1.19406	0.159256	0.789238
0.18137	1.70897	0.0571711	0.798668	0.058529	0.675775	0.0536292	0.950984	0.0939595	0.707487	0.19239	1.60836	0.12083	1.38095	0.0938811	1.24444	0.0464409	1.21541	0.0391805	0.846308
0.183301	1.73447	0.0251017	0.736477	0.0315395	0.674662	0.0451581	1.00786	0.0797464	0.652219	0.214201	1.61394	0.102583	1.31606	0.0708438	1.23541	0.0544507	1.18661	0.0547629	0.786393
0.17503	1.71107	0.0606892	0.73485	0.0797543	0.658682	0.0835645	0.950282	0.0591059	0.667188	0.1714	1.61765	0.255115	1.32502	0.0705239	1.20833	0.0571032	1.18994	5.15779	0.780917
0.22191	1.70156	0.0396215	0.727761	0.0989025	0.686807	0.0506825	0.948118	0.0681241	0.667756	0.18962	1.61431	0.134647	1.33146	0.0659623	1.23463	0.0612474	1.18669	0.0331685	0.780034
0.264247	1.70057	0.0314282	0.751297	0.0396623	0.662438	0.0666644	0.957265	0.0493567	0.669917	0.232381	1.59808	0.295738	1.31861	0.318628	1.20585	0.0597038	1.18208	0.368934	0.784349
0.176756	1.69908	0.0755859	0.753148	0.0435018	0.662794	0.049913	0.954248	0.0656684	0.737238	0.265983	1.60815	0.120528	1.32375	0.0567011	1.1948	0.0774451	1.22497	0.0517128	0.842461
0.340127	1.68964	0.0343636	0.788039	0.0414401	0.672772	0.0363836	0.952974	0.0668371	0.662223	0.288663	1.60614	0.115011	1.31571	0.0607591	1.19184	0.0668573	1.2359	0.0320671	0.839898
0.261459	1.72424	0.047808	0.746349	0.0513114	0.661726	0.05131	0.955774	0.0645631	0.655786	0.209755	1.60073	0.115701	1.32191	0.0711778	1.19135	0.0572605	1.19157	0.200009	0.787341
0.269104	1.7492	0.048182	0.750103	0.0358261	0.671965	0.051933	0.946507	0.0562083	0.672568	0.175818	1.61319	0.110897	1.31866	0.0648231	1.19	0.0541039	1.20473	2.61346	0.791347
0.194678	1.67744	0.0573556	0.739541	0.0516456	0.718615	0.0419519	0.951794	0.0676456	0.657799	0.164641	1.60532	0.104613	1.31736	0.062954	1.19933	0.0800961	1.19441	0.62249	0.819218
0.203954	1.681	0.0727535	0.748237	0.0366995	0.668997	0.0551835	0.939241	0.0585144	0.65678	0.246316	1.59094	0.139372	1.32576	0.0641432	1.20005	0.0566802	1.18087	0.0479647	0.777384
0.233417	1.68927	0.0389973	0.756439	0.0507045	0.662296	0.0397428	0.955277	0.0654571	0.672578	3.14975	1.62319	0.141025	1.32436	0.0870867	1.19279	0.0513566	1.18488	2.6684	0.824346
0.186481	1.70008	0.0609542	0.75195	0.0501391	0.674494	0.0482178	0.997276	0.0647677	0.66292	0.211287	1.60904	0.129593	1.31925	0.0594638	1.19772	0.0464571	1.19391	0.0456203	0.783238
0.214924	1.6998	0.0622143	0.749033	0.0408552	0.664314	0.0504353	0.947147	0.0632645	0.681417	0.245394	1.60823	0.109131	1.31756	0.074461	1.23899	0.0574104	1.18319	1.35496	0.769662
0.205239	1.70548	0.052836	0.736623	0.0364208	0.664351	0.0544093	0.953495	0.0795043	0.686731	0.746355	1.6075	0.148374	1.32891	0.0620764	1.19211	0.0557964	1.18092	19.7515	0.772487
0.154578	1.70252	0.056737	0.752609	0.0560317	0.680427	0.0528425	0.945504	0.0632407	0.707253	0.88639	1.60065	0.11261	1.35116	0.067755	1.21145	0.0579472	1.19197	0.0320605	0.774871
0.257338	1.68802	0.0890465	0.746296	0.0425669	0.66532	0.0633154	0.959213	0.0669024	0.676995	0.223724	1.61859	0.119306	1.35621	0.0685448	1.19708	0.0591489	1.22135	1.03686	0.782091
0.24405	1.72556	0.0744114	0.735472	0.0383285	0.656668	0.0520127	0.949222	0.0711242	0.66811	0.155587	1.62042	0.105973	1.35896	0.0661644	1.1913	0.0512843	1.18198	0.0350019	0.807068
0.158706	1.69966	0.0434801	0.740452	0.0389921	0.675896	0.0457693	0.944498	0.0743391	0.694699	0.185798	1.64561	0.118887	1.32899	0.0610114	1.19994	0.0593853	1.18268	0.0326323	0.78224
0.160041	1.67976	0.0309003	0.734606	0.0325715	0.661771	0.0619661	0.93858	0.0514175	0.668293	0.25246	1.61847	0.11651	1.32567	0.0697593	1.2066	0.0491181	1.17707	1.19295	0.809047
0.16437	1.67875	0.0895806	0.784884	0.0452021	0.664445	0.0492979	0.941941	0.0744501	0.661729	0.180725	1.60695	0.153747	1.32742	0.0665621	1.19883	0.0491111	1.18117	0.0482221	0.77515
0.243441	1.72844	0.0267102	0.730805	0.0689662	0.671033	0.0496585	0.962092	0.05798	0.667634	0.156886	1.61945	0.138017	1.31903	0.0708794	1.20361	0.0486177	1.1786	0.991255	0.792915
0.234213	1.68059	0.0306441	0.729247	0.0400852	0.660102	0.0795022	1.01463	0.0785405	0.656468	0.200556	1.59175	0.119425	1.3178	0.0541803	1.20455	0.0551589	1.18264	9.93403	0.780391
0.201782	1.68628	0.0259542	0.736809	0.0439962	0.657063	0.0429583	0.951482	0.0600737	0.671189	0.200754	1.59225	0.150019	1.35755	0.07165	1.19064	0.0503705	1.1791	0.0344116	0.773909
0.180826	1.71359	0.0546305	0.744108	0.0492728	0.675186	0.046517	0.954779	0.0715784	0.677666	0.175899	1.65893	0.52768	1.33001	0.0947585	1.19755	0.049736	1.18608	17.345	0.787263
0.183051	1.68456	0.0354152	0.734733	0.031376	0.661922	0.0499689	0.955285	0.0595281	0.664853	0.228352	1.61265	0.119476	1.32886	0.0603426	1.19701	0.0653718	1.17687	0.937942	0.78428
0.142258	1.7114	0.062141	0.739298	0.0430364	0.6675	0.0721106	0.952729	0.0699481	0.661997	0.226109	1.60188	0.127972	1.32361	0.0660777	1.19934	0.0459614	1.19014	0.0326988	0.771972
0.172651	1.69765	0.0407224	0.771754	0.0634825	0.67459	0.0798622	0.95701	0.0517689	0.678481	0.214955	1.61655	0.123919	1.32325	0.0651857	1.1974	0.0551367	1.18773	0.13598	0.770863
0.156622	1.68234	0.270719	0.795596	0.0454864	0.661002	0.0656592	0.986974	0.425044	0.656879	0.195946	1.64683	0.129491	1.32132	0.0771566	1.19202	0.0481665	1.18871	0.0470111	0.7696
0.249658	1.66693	0.065893	0.732513	0.059075	0.659748	0.0437399	0.949241	0.0505155	0.668672	0.195199	1.59812	0.18375	1.32196	0.0609378	1.2233	0.085515	1.18976	0.0371227	0.77585
0.150216	1.67785	0.0669914	0.72948	0.0314015	0.671927	0.0721079	0.953544	0.0849365	0.674466	0.231491	1.63085	0.13647	1.33674	0.054866	1.20625	0.0622562	1.1811	0.0497959	0.77712
0.157814	1.68414	0.0336556	0.737709	0.0460162	0.658866	0.0683837	0.951136	0.073784	0.655813	0.234951	1.59837	0.108098	1.35461	0.0559284	1.20318	0.102446	1.18884	10.4249	0.778801
0.137184	1.66681	0.0579345	0.75985	0.0297449	0.659697	0.0510726	0.967311	0.0847521	0.664963	0.228689	1.61905	0.299741	1.33056	0.0627529	1.19575	0.05725	1.18219	0.0318851	0.773188
0.169544	1.68516	0.0340192	0.732533	0.0481906	0.669618	0.0465047	0.967741	0.0752561	0.687352	0.211132	1.60066	0.137176	1.33614	0.0715362	1.20319	0.04879	1.18544	0.0562602	0.776484
0.155321	1.73638	0.0784606	0.72924	0.0505489	0.659217	0.0655549	0.948815	0.0513006	0.667202	0.219939	1.63439	0.153898	1.32105	0.0757973	1.2558	0.0530247	1.16687	0.0475508	0.787227
0.144768	1.69832	0.0788792	0.743691	0.0479825	0.660478	0.0460028	0.946877	0.0609672	0.685062	0.246518	1.59265	0.155542	1.33018	0.0627967	1.19605	0.0801155	1.18082	0.0319169	0.778713
0.133123	1.69958	0.0307931	0.747093	0.0302783	0.668258	0.0409313	0.952802	0.0760191	0.708835	0.199225	1.62445	0.124658	1.32379	0.0521919	1.2558	0.046986	1.20294	1.57075	0.777673
0.150358	1.70986	0.0589071	0.774834	0.130371	0.659787	0.0505303	0.9546	0.0938703	0.674803	0.226757	1.65859	0.198	1.31612	0.0695976	1.21689	0.0516927	1.22831	0.0513953	0.772108
0.175126	1.70821	0.0280075	0.740854	0.0329966	0.6562	0.0441232	0.954808	0.0646982	0.659261	0.248425	1.67924	0.142505	1.36096	0.0732853	1.20454	0.0760217	1.18871	0.0700485	0.776928
0.168618	1.70326	0.0277372	0.79077	0.0335571	0.681806	0.0485814	0.949293	0.0483584	0.666254	0.221575	1.59711	0.13113	1.31263	0.0633286	1.18695	0.0596077	1.18256	0.0795789	0.801538
0.25127	1.70566	0.0512199	0.801276	0.0358961	0.738275	0.0724436	0.949362	0.0567329	0.665877	0.218987	1.61054	0.0939448	1.3337	0.0635988	1.19044	0.0505314	1.18288	0.232715	0.814276
0.287424	1.70003	0.0376792	0.856686	0.0437575	0.669431	0.0462188	0.952151	0.0592539	0.66524	0.228448	1.59431	0.106839	1.37724	0.0491495	1.19158	0.602782	1.1698	3.39806	0.775395
0.142479	1.68987	0.0278073	1.40806	0.0446061	0.67144	0.0590886	0.958846	0.0642536	0.676685	0.186448	1.60254	0.114496	1.30698	0.0832604	1.19682	0.0482929	1.16666	3.86879	0.774224
0.156379	1.69715	0.0310025	1.13296	0.0449542	0.662516	0.048493	0.994514	0.0710924	0.667318	0.214382	1.59184	0.13192	1.3141	0.0659497	1.19824	0.0526166	1.17322	6.28408	0.78148
0.153185	1.72965	0.0542216	0.807756	0.0351971	0.656402	0.0468412	0.953548	0.0481407	0.661171	0.217439	1.5936	0.108124	1.31733	0.0621816	1.22493	0.0679984	1.15533	0.0428312	0.777924
0.165	1.69833	0.0193058	0.783742	0.0614949	0.673353	0.106637	0.949132	0.0607012	0.683474	0.190554	1.64179	0.122523	1.31912	0.0849026	1.19043	0.057385	1.17239	0.0342767	0.771617
0.422001	1.6924	0.0768132	0.816292	0.049172	0.664392	0.0438934	0.94816	0.0707299	0.702861	0.232063	1.6057	0.122225	1.29942	0.0761903	1.18944	0.0498003	1.18742	1.7822	0.770323
0.191404	1.70193	0.0260135	0.846716	0.0685176	0.663921	0.141867	0.996545	0.0730348	0.655698	0.200621	1.61726	0.131197	1.32404	0.0892546	1.1805	0.0601971	1.22159	0.0410628	0.788799
0.431602	1.70624	0.0630504	0.787602	0.0393697	0.72736	0.0448581	0.956452	0.0681323	0.672621	0.241787	1.60086	0.170828	1.30802	0.077501	1.18528	0.0522806	1.18611	0.0360475	0.805418
0.172263	1.68877	0.0427284	0.787502	0.0420459	0.690349	0.0513861	0.953102	0.0802315	0.67362	0.426765	1.58986	0.931872	1.30325	0.069513	1.19647	0.0721069	1.17888	0.0352231	0.795134
0.271408	1.69833	0.0303169	0.800381	0.0376352	0.71097	0.0490345	0.955334	0.060202	0.659985	0.30497	1.60742	0.110766	1.29784	0.0821263	1.19577	0.0573779	1.16849	0.0453458	0.833887
0.237342	1.72078	0.0239022	0.787296	0.0523584	0.666419	0.0582802	0.952205	0.0707088	0.670642	0.190941	1.59389	0.128701	1.33584	0.0736922	1.19831	0.0444692	1.17913	1.167	0.783616

## Sheet: Graphs Cost
RRT	A*	RRT	A*	RRT	A*	RRT	A*	RRT	A*	RRT	A*	RRT	A*	RRT	A*	RRT	A*	RRT	A*
2189.42	1806.69	601.487	490.421	891.654	560.543	1077.19	923.85	670.572	565.271	1914.76	1705.98	1773.4	1623.85	1419.19	1265.27	1327.51	1237.72	799.185	710.129
2034.99	1806.69	632.167	490.421	719.512	560.543	1059.76	923.85	681.612	565.271	1961.21	1705.98	1855.05	1623.85	1411.07	1265.27	1338.76	1237.72	813.87	710.129
2003.39	1806.69	734.445	490.421	650.665	560.543	1026.96	923.85	882.278	565.271	1912.77	1705.98	1820.71	1623.85	1392.87	1265.27	1321.62	1237.72	869.658	710.129
2033.67	1806.69	643.794	490.421	646.491	560.543	1032.73	923.85	739.352	565.271	2076.37	1705.98	1843.99	1623.85	1379.27	1265.27	1330.82	1237.72	815.186	710.129
2243.86	1806.69	524.422	490.421	671.25	560.543	1124.48	923.85	699.427	565.271	1904.37	1705.98	1938.17	1623.85	1384.64	1265.27	1481.51	1237.72	845.219	710.129
2066.34	1806.69	642.008	490.421	634.604	560.543	1058.97	923.85	688.613	565.271	1931.59	1705.98	1852.93	1623.85	1394.29	1265.27	1360.08	1237.72	752.949	710.129
2050.51	1806.69	570.889	490.421	737.548	560.543	1190.84	923.85	734.314	565.271	1853.32	1705.98	1893.38	1623.85	1387.38	1265.27	1343.37	1237.72	773.042	710.129
2032.5	1806.69	605.58	490.421	739.586	560.543	1087.18	923.85	722.392	565.271	1938.58	1705.98	1890.21	1623.85	1400.08	1265.27	1333.59	1237.72	769.433	710.129
1981.72	1806.69	642.393	490.421	651.86	560.543	1072.11	923.85	997.328	565.271	1916.73	1705.98	2057.65	1623.85	1400.43	1265.27	1329.65	1237.72	797.652	710.129
2178.36	1806.69	560.678	490.421	690.097	560.543	1089.26	923.85	729.224	565.271	1984.99	1705.98	1853.83	1623.85	1392.91	1265.27	1313.26	1237.72	810.41	710.129
1956.18	1806.69	595.328	490.421	703.282	560.543	1082.16	923.85	738.984	565.271	1934.21	1705.98	1842.67	1623.85	1468.09	1265.27	1318.33	1237.72	812.789	710.129
2060.9	1806.69	535.086	490.421	833.942	560.543	1079.07	923.85	869.184	565.271	1889.87	1705.98	1808.77	1623.85	1408.92	1265.27	1373.24	1237.72	778.615	710.129
1984.27	1806.69	545.709	490.421	646.493	560.543	1001.52	923.85	722.527	565.271	1941.2	1705.98	1854.14	1623.85	1453.61	1265.27	1325.79	1237.72	911.039	710.129
2195.33	1806.69	540.361	490.421	810.894	560.543	1078.44	923.85	754.718	565.271	2218.14	1705.98	1970.55	1623.85	1378.92	1265.27	1355.16	1237.72	793.536	710.129
2055.89	1806.69	662.848	490.421	648.627	560.543	1125.02	923.85	792.512	565.271	1923.15	1705.98	1891.24	1623.85	1382.17	1265.27	1363.6	1237.72	842.652	710.129
2185.73	1806.69	546.72	490.421	708.438	560.543	1126.39	923.85	664.294	565.271	1941.86	1705.98	1916.53	1623.85	1329.87	1265.27	1337.34	1237.72	830.244	710.129
2020.77	1806.69	596.234	490.421	779.317	560.543	1014.98	923.85	731.125	565.271	2020.68	1705.98	1838.33	1623.85	1588.17	1265.27	1348.32	1237.72	777.167	710.129
2013.98	1806.69	642.325	490.421	683.783	560.543	1096.41	923.85	711.343	565.271	1925.48	1705.98	1833.41	1623.85	1665.9	1265.27	1479.57	1237.72	775.174	710.129
2134.43	1806.69	657.498	490.421	717.884	560.543	1022.61	923.85	780.493	565.271	1941.46	1705.98	1930.38	1623.85	1425.1	1265.27	1355.39	1237.72	786.895	710.129
2033.22	1806.69	520.528	490.421	705.875	560.543	1095.8	923.85	781.095	565.271	1900.2	1705.98	1855.49	1623.85	1340.1	1265.27	1314.79	1237.72	804.563	710.129
2046.7	1806.69	655.063	490.421	735.788	560.543	1046.92	923.85	699.8	565.271	1869.79	1705.98	1890.56	1623.85	1356	1265.27	1372.79	1237.72	776.106	710.129
2086.57	1806.69	582.404	490.421	761.819	560.543	1100.56	923.85	623.74	565.271	1897.84	1705.98	1842.01	1623.85	1421.55	1265.27	1331.76	1237.72	799.468	710.129
2092.23	1806.69	578.697	490.421	708.21	560.543	1037.76	923.85	746.321	565.271	1882.82	1705.98	1813.62	1623.85	1365.7	1265.27	1380.87	1237.72	787.874	710.129
2002.35	1806.69	611.174	490.421	916.667	560.543	1028.73	923.85	748.422	565.271	1982.44	1705.98	1816.65	1623.85	1537.94	1265.27	1361.64	1237.72	771.323	710.129
2068.3	1806.69	654.421	490.421	691.503	560.543	1010.45	923.85	810.022	565.271	1933.88	1705.98	1842.31	1623.85	1344.52	1265.27	1477.23	1237.72	791.751	710.129
2111.72	1806.69	599.556	490.421	689.583	560.543	1042.29	923.85	708.128	565.271	2018.03	1705.98	1852.83	1623.85	1425.81	1265.27	1308.66	1237.72	801.412	710.129
2221	1806.69	609.133	490.421	792.596	560.543	1143.12	923.85	730.781	565.271	2012.88	1705.98	1812.33	1623.85	1444.2	1265.27	1359.87	1237.72	797.344	710.129
2036.89	1806.69	651.663	490.421	681.219	560.543	1038.1	923.85	763.949	565.271	2080.96	1705.98	1824.06	1623.85	1323.74	1265.27	1403.68	1237.72	805.505	710.129
2014.83	1806.69	750.018	490.421	693.93	560.543	1050.42	923.85	688.548	565.271	1941.06	1705.98	1860.34	1623.85	1361.23	1265.27	1384.13	1237.72	800.645	710.129
2162.19	1806.69	560.839	490.421	709.101	560.543	1089.47	923.85	691.863	565.271	1888.07	1705.98	1796.95	1623.85	1399.27	1265.27	1347.28	1237.72	1054.71	710.129
2206	1806.69	706.325	490.421	652.729	560.543	1044.11	923.85	708.651	565.271	1937.08	1705.98	1881.98	1623.85	1344.63	1265.27	1333.62	1237.72	775.818	710.129
2048.17	1806.69	651.539	490.421	774.641	560.543	1099.13	923.85	731.468	565.271	1957	1705.98	1863.46	1623.85	1384.56	1265.27	1352.52	1237.72	753.125	710.129
2002.77	1806.69	651.524	490.421	673.829	560.543	1046.49	923.85	690.671	565.271	1908.19	1705.98	1959.94	1623.85	1390.9	1265.27	1352.09	1237.72	825.006	710.129
2055	1806.69	555.411	490.421	746.152	560.543	1065.12	923.85	747.586	565.271	1861.88	1705.98	1800.43	1623.85	1387.2	1265.27	1350.43	1237.72	790.381	710.129
2032.31	1806.69	698.709	490.421	679.704	560.543	990.165	923.85	717.008	565.271	1925.4	1705.98	1857.55	1623.85	1357.89	1265.27	1402.26	1237.72	831.696	710.129
2049.21	1806.69	601.689	490.421	696.359	560.543	1027.14	923.85	712.638	565.271	1825.1	1705.98	1846.85	1623.85	1400.16	1265.27	1331.64	1237.72	814.789	710.129
2019.43	1806.69	618.177	490.421	790.656	560.543	1077.99	923.85	777.732	565.271	1937.5	1705.98	1952.66	1623.85	1383.95	1265.27	1381.26	1237.72	783.803	710.129
2140.54	1806.69	622.51	490.421	682.304	560.543	1042.85	923.85	879.03	565.271	1994.99	1705.98	1853.91	1623.85	1381.45	1265.27	1358.71	1237.72	791.536	710.129
2115.54	1806.69	602.595	490.421	644.933	560.543	1157.79	923.85	711.833	565.271	1936.28	1705.98	1940.95	1623.85	1473.64	1265.27	1330.34	1237.72	782.68	710.129
2046.1	1806.69	756.791	490.421	678.954	560.543	1152.96	923.85	743.725	565.271	1882.7	1705.98	1828.73	1623.85	1388.62	1265.27	1535.58	1237.72	964.744	710.129
2140.72	1806.69	590.663	490.421	728.061	560.543	993.166	923.85	708.748	565.271	1959.14	1705.98	1828.3	1623.85	1411.9	1265.27	1350.46	1237.72	814.94	710.129
2038.68	1806.69	591.439	490.421	760.498	560.543	1139.93	923.85	719.208	565.271	1931.53	1705.98	1993.39	1623.85	1383.72	1265.27	1412.34	1237.72	802.039	710.129
2056.37	1806.69	606.167	490.421	659.427	560.543	1111.91	923.85	886.269	565.271	1903.63	1705.98	1848.05	1623.85	1418.81	1265.27	1368.81	1237.72	795.252	710.129
2097.58	1806.69	610.718	490.421	654.627	560.543	1099.39	923.85	687.336	565.271	1837.44	1705.98	1890.53	1623.85	1444.25	1265.27	1382.7	1237.72	788.336	710.129
2107.87	1806.69	584.245	490.421	700.376	560.543	1067.68	923.85	657.997	565.271	1960.26	1705.98	1860.08	1623.85	1414.15	1265.27	1335.65	1237.72	789.865	710.129
2160.73	1806.69	568.495	490.421	753.676	560.543	1017	923.85	690.459	565.271	1917	1705.98	1806.27	1623.85	1436.94	1265.27	1326.35	1237.72	781.241	710.129
2022.49	1806.69	593.775	490.421	682.355	560.543	1009.5	923.85	688.171	565.271	1906.35	1705.98	1830.53	1623.85	1357.59	1265.27	1381.07	1237.72	773.44	710.129
2013.1	1806.69	536.933	490.421	678.025	560.543	1071.59	923.85	852.977	565.271	1938.7	1705.98	1861.33	1623.85	1364.49	1265.27	1353.94	1237.72	850.624	710.129
2034.97	1806.69	637.478	490.421	731.391	560.543	994.494	923.85	902.469	565.271	1978.61	1705.98	1854.34	1623.85	1382.03	1265.27	1311.29	1237.72	803.279	710.129
1987.38	1806.69	594.226	490.421	646.464	560.543	1003.09	923.85	720.59	565.271	1960.13	1705.98	1844.36	1623.85	1361.03	1265.27	1375.09	1237.72	824.292	710.129
2072.85	1806.69	691.083	490.421	774.157	560.543	1079.96	923.85	674.184	565.271	1904.96	1705.98	1937.84	1623.85	1453.28	1265.27	1375.79	1237.72	778.909	710.129
2075.76	1806.69	557.383	490.421	887.202	560.543	988.304	923.85	767.038	565.271	1871.61	1705.98	1965.07	1623.85	1442.54	1265.27	1342.25	1237.72	772.114	710.129
2190.98	1806.69	560.848	490.421	676.323	560.543	1088.57	923.85	674.436	565.271	1951.9	1705.98	2029.49	1623.85	1401.58	1265.27	1298.3	1237.72	799.088	710.129
2094.84	1806.69	814.238	490.421	750.928	560.543	1119.54	923.85	738.146	565.271	1881.39	1705.98	1897.91	1623.85	1371.76	1265.27	1418.19	1237.72	777.901	710.129
2218.8	1806.69	617.422	490.421	704.019	560.543	1051.12	923.85	790.621	565.271	2003.89	1705.98	1818.78	1623.85	1429.64	1265.27	1501.03	1237.72	818.136	710.129
2165.05	1806.69	591.752	490.421	706.555	560.543	1031.6	923.85	775.541	565.271	1943.05	1705.98	1822.78	1623.85	1420.45	1265.27	1292.54	1237.72	769.546	710.129
2134.81	1806.69	545.878	490.421	676.584	560.543	1097.61	923.85	751.342	565.271	1954.02	1705.98	1893.38	1623.85	1405.81	1265.27	1331.75	1237.72	819.733	710.129
2081.49	1806.69	570.46	490.421	633.984	560.543	1057.77	923.85	690.631	565.271	1922.58	1705.98	1871.15	1623.85	1399.48	1265.27	1380.84	1237.72	1012.86	710.129
1973.49	1806.69	594.818	490.421	687.374	560.543	1097.63	923.85	664.115	565.271	1820.06	1705.98	1842.1	1623.85	1382.1	1265.27	1299.99	1237.72	771.766	710.129
2029.33	1806.69	564.399	490.421	705.209	560.543	1062.99	923.85	709.656	565.271	2194.43	1705.98	1820.39	1623.85	1422.72	1265.27	1326.4	1237.72	914.184	710.129
1992.4	1806.69	596.583	490.421	816.424	560.543	1094.94	923.85	633.408	565.271	2010.74	1705.98	1867.89	1623.85	1410.38	1265.27	1312.61	1237.72	797.761	710.129
2134.66	1806.69	565.149	490.421	660.985	560.543	1006.32	923.85	756.194	565.271	1980.09	1705.98	1835.19	1623.85	1370.37	1265.27	1371.37	1237.72	985.701	710.129
2002.2	1806.69	579.735	490.421	694.06	560.543	1173.99	923.85	776.171	565.271	2152.55	1705.98	1864.87	1623.85	1419.93	1265.27	1371.02	1237.72	785.062	710.129
2059.13	1806.69	640.558	490.421	718.431	560.543	1140.18	923.85	769.292	565.271	2221.27	1705.98	1799.22	1623.85	1362.12	1265.27	1328.17	1237.72	754.142	710.129
2191.38	1806.69	628.263	490.421	640.973	560.543	1040.21	923.85	874.417	565.271	1902.23	1705.98	1863.5	1623.85	1461.51	1265.27	1380.19	1237.72	840.111	710.129
2212.41	1806.69	788.975	490.421	731.429	560.543	1144.7	923.85	918.375	565.271	1866.96	1705.98	1816.67	1623.85	1363.84	1265.27	1367.22	1237.72	760.031	710.129
2078.41	1806.69	570.934	490.421	714.182	560.543	1102.48	923.85	680.846	565.271	1959.45	1705.98	1872.88	1623.85	1386.71	1265.27	1354.65	1237.72	810.889	710.129
2091.81	1806.69	552.015	490.421	655.498	560.543	1111.01	923.85	670.122	565.271	1933.37	1705.98	1902.05	1623.85	1382.61	1265.27	1362.6	1237.72	1032.83	710.129
2057.89	1806.69	649.094	490.421	842.803	560.543	1001	923.85	633.8	565.271	1929.04	1705.98	1975.14	1623.85	1354.69	1265.27	1381.99	1237.72	843.038	710.129
2141.42	1806.69	598.355	490.421	863.348	560.543	1125.92	923.85	643.598	565.271	1910.02	1705.98	1818.14	1623.85	1450.95	1265.27	1331.09	1237.72	877.682	710.129
2016.46	1806.69	629.041	490.421	804.034	560.543	1071.49	923.85	664.564	565.271	1961.23	1705.98	1863.1	1623.85	1391.27	1265.27	1350.84	1237.72	898.167	710.129
2039.66	1806.69	564.507	490.421	729.506	560.543	1051.41	923.85	662.405	565.271	1988.07	1705.98	1866.69	1623.85	1334.09	1265.27	1338.32	1237.72	794.889	710.129
2129.04	1806.69	581.87	490.421	728.3	560.543	1109.26	923.85	730.71	565.271	1917.01	1705.98	2010.16	1623.85	1454.13	1265.27	1315.62	1237.72	775.239	710.129
2032.18	1806.69	605.042	490.421	687.37	560.543	1058.53	923.85	760.059	565.271	2001.95	1705.98	1888.95	1623.85	1381.13	1265.27	1338.01	1237.72	819.655	710.129
2067.52	1806.69	698.594	490.421	673.748	560.543	1147.73	923.85	981.031	565.271	1836.09	1705.98	1910.46	1623.85	1386.02	1265.27	1321.51	1237.72	762.045	710.129
1977.61	1806.69	612.144	490.421	787.036	560.543	1137.67	923.85	679.625	565.271	2050.66	1705.98	1850.16	1623.85	1377.49	1265.27	1324.6	1237.72	772.295	710.129
2050.49	1806.69	677.074	490.421	705.823	560.543	1116.84	923.85	1094.43	565.271	2052.79	1705.98	1901.15	1623.85	1459.96	1265.27	1350.93	1237.72	801.638	710.129
2216.61	1806.69	669.158	490.421	703.124	560.543	1087.65	923.85	667.824	565.271	1926.83	1705.98	1904.72	1623.85	1404.96	1265.27	1506.75	1237.72	814.175	710.129
2005.35	1806.69	628.467	490.421	661.709	560.543	1131.76	923.85	731.252	565.271	1959.48	1705.98	1917.89	1623.85	1388.92	1265.27	1408.72	1237.72	809.106	710.129
2028.88	1806.69	583.924	490.421	694.572	560.543	1077.77	923.85	754.449	565.271	2009.42	1705.98	1876.09	1623.85	1397.77	1265.27	1426.72	1237.72	880.787	710.129
2005.02	1806.69	623.649	490.421	654.242	560.543	1095.25	923.85	910.66	565.271	1975.98	1705.98	1995.53	1623.85	1388.39	1265.27	1356.94	1237.72	772.986	710.129
2036.87	1806.69	559.211	490.421	623.275	560.543	1012.1	923.85	807.549	565.271	2067.59	1705.98	1875.11	1623.85	1375.97	1265.27	1358.07	1237.72	781.274	710.129
1978.8	1806.69	682.921	490.421	631.919	560.543	1090.54	923.85	715.523	565.271	1948.51	1705.98	1871.61	1623.85	1384.52	1265.27	1316.28	1237.72	782.683	710.129
2057.49	1806.69	605.933	490.421	691.168	560.543	1036.82	923.85	743.052	565.271	1996.06	1705.98	1935.31	1623.85	1393.2	1265.27	1375.96	1237.72	788.298	710.129
1996.66	1806.69	628.472	490.421	692.369	560.543	992.101	923.85	752.145	565.271	1938.72	1705.98	1931	1623.85	1392.4	1265.27	1332.51	1237.72	903.311	710.129
1946.37	1806.69	549.263	490.421	934.183	560.543	1105.29	923.85	689.881	565.271	1940.18	1705.98	1905.32	1623.85	1386.54	1265.27	1371.81	1237.72	796.203	710.129
2105.16	1806.69	621.922	490.421	639.434	560.543	1071.55	923.85	751.554	565.271	1899.57	1705.98	1880.12	1623.85	1411.98	1265.27	1355.17	1237.72	780.975	710.129
2028.18	1806.69	650.358	490.421	659.64	560.543	1094.82	923.85	704.51	565.271	1896.26	1705.98	1907.93	1623.85	1375.23	1265.27	1386.02	1237.72	809.248	710.129
2085.46	1806.69	582.42	490.421	686.884	560.543	1020.3	923.85	643.383	565.271	1889.63	1705.98	1833.46	1623.85	1390.1	1265.27	1348.73	1237.72	870.117	710.129
2119.83	1806.69	574.581	490.421	665.807	560.543	1089.27	923.85	730.321	565.271	1949.66	1705.98	1819.06	1623.85	1357.56	1265.27	1423.21	1237.72	814.51	710.129
1978.44	1806.69	568.449	490.421	612.915	560.543	1116.47	923.85	742.582	565.271	1917.96	1705.98	1818.94	1623.85	1494.93	1265.27	1350.27	1237.72	804.225	710.129
1995.32	1806.69	546.515	490.421	790.875	560.543	1111.75	923.85	735.964	565.271	1948.94	1705.98	1915.97	1623.85	1423.69	1265.27	1361.13	1237.72	997.962	710.129
1982.25	1806.69	561.264	490.421	766.61	560.543	1059.92	923.85	690.659	565.271	1914.17	1705.98	1856.31	1623.85	1370.69	1265.27	1369.08	1237.72	777.327	710.129
2004.23	1806.69	574.586	490.421	717.001	560.543	1111.19	923.85	697.586	565.271	1947.26	1705.98	1859.07	1623.85	1359.46	1265.27	1387.11	1237.72	784.595	710.129
2130.13	1806.69	554.149	490.421	750.022	560.543	1110.79	923.85	641.626	565.271	1958.79	1705.98	1854.75	1623.85	1425.21	1265.27	1305.31	1237.72	789.769	710.129
2034.56	1806.69	552.223	490.421	740.863	560.543	1169.29	923.85	717.295	565.271	1956.2	1705.98	1855.96	1623.85	1464.52	1265.27	1330.45	1237.72	781.601	710.129
2129.84	1806.69	619.785	490.421	849.654	560.543	1120.21	923.85	885.326	565.271	1990.4	1705.98	1853.93	1623.85	1446.22	1265.27	1320.64	1237.72	771.677	710.129
2018.3	1806.69	659.939	490.421	690.33	560.543	1070.27	923.85	772.91	565.271	1979.34	1705.98	2080.37	1623.85	1427.51	1265.27	1339.25	1237.72	798.722
1999.39	1806.69	603.696	490.421	655.194	560.543	1031.06	923.85	736.977	565.271	2035.86	1705.98	1847.11	1623.85	1498.31	1265.27	1365.63	1237.72	800.325
2197.16	1806.69	556.139	490.421	721.661	560.543	1043.41	923.85	681.087	565.271	1923.13	1705.98	1917.86	1623.85	1420.72	1265.27	1353.88	1237.72	796.103
